# Supplementary material
Source: PubMed Central journal article supplement (PMC2453732)
Supplement: 0802505105_0802505105SI.pdf [file 0802505105_0802505105SI.pdf]

# Supporting Information

Ponnusamy *et al.* 10.1073/pnas.0802505105

**Table S1. Identification of bacterial species isolated from bamboo and white-oak leaf infusions**

| Isolate* | No. of bases used to establish identity | Accession number in GenBank | Species corresponding to closest relative (% sequence identity) | Phylogenetic affiliation |
|----------|-----------------------------------------|-----------------------------|-----------------------------------------------------------------|--------------------------|
| B1       | 714                                     | EU341308                    | <i>Bacillus thuringiensis</i> (99)                              | Firmicutes               |
| B2       | 617                                     | EU341309                    | <i>Enterobacter asburiae</i> (98)                               | Gammaproteobacteria      |
| B3       | 760                                     | EU341310                    | <i>Enterobacter cancerogenus</i> (98)                           | Gammaproteobacteria      |
| B4       | 758                                     | EU341311                    | <i>Pseudomonas fulva</i> (99)                                   | Gammaproteobacteria      |
| B5       | 763                                     | EU341312                    | <i>Lactococcus lactis</i> (99)                                  | Firmicutes               |
| B6       | 743                                     | EU341313                    | <i>Enterobacter gergoviae</i> (97)                              | Gammaproteobacteria      |
| B7       | 770                                     | EU341314                    | <i>Enterobacter ludwigii</i> (97)                               | Gammaproteobacteria      |
| B8       | 783                                     | EU341315                    | <i>Klebsiella oxytoca</i> (98)                                  | Gammaproteobacteria      |
| B9       | 770                                     | EU341316                    | <i>Klebsiella granulomatis</i> (98)                             | Gammaproteobacteria      |
| B10      | 716                                     | EU341319                    | <i>Pseudomonas plecoglossicida</i> (99)                         | Gammaproteobacteria      |
| B11      | 770                                     | EU341318                    | <i>Rhizobium huautlense</i> (97)                                | Alphaproteobacteria      |
| B12      | 604                                     | EU341319                    | <i>Shigella dysenteriae</i> (76)                                | Gammaproteobacteria      |
| B13      | 764                                     | EU341320                    | <i>Citrobacter freundii</i> (97)                                | Gammaproteobacteria      |
| B14      | 511                                     | EU341321                    | <i>Brevundimonas vesicularis</i> (98)                           | Alphaproteobacteria      |
| WO1      | 483                                     | EF685171                    | <i>Porphyrobacter</i> sp. (97)                                  | Alphaproteobacteria      |
| WO2      | 400                                     | EF685175                    | <i>Pseudomonas lanceolata</i> (98)                              | Betaproteobacteria       |
| WO3      | 464                                     | EU489484                    | <i>Variovorax koreensis</i> (97)                                | Betaproteobacteria       |
| WO4      | 490                                     | EF685166                    | <i>Agrobacterium tumefaciens</i> (99)                           | Alphaproteobacteria      |
| WO5      | 328                                     | EF685177                    | <i>Rhizobium huautlense</i> (96)                                | Alphaproteobacteria      |
| WO6      | 480                                     | EU489485                    | <i>Enterobacter asburiae</i> (98)                               | Gammaproteobacteria      |
| WO7      | 525                                     | EF685176                    | <i>Acidiphilium rubrum</i> (89)                                 | Alphaproteobacteria      |
| WO8      | 356                                     | EF685167                    | <i>Acidovorax avenae</i> (90)                                   | Betaproteobacteria       |
| WO9      | 480                                     | EF685170                    | <i>Pseudomonas lanceolata</i> (97)                              | Betaproteobacteria       |
| WO10     | 585                                     | EF685164                    | <i>Variovorax koreensis</i> (90)                                | Betaproteobacteria       |
| WO11     | 360                                     | EU489486                    | <i>Klebsiella granulomatis</i> (99)                             | Gammaproteobacteria      |
| WO12     | 529                                     | EF685178                    | <i>Pseudomonas syringae</i> (98)                                | Gammaproteobacteria      |
| WO13     | 400                                     | EF685175                    | <i>Curvibacter gracilis</i> (97)                                | Betaproteobacteria       |
| WO14     | 521                                     | EF685173                    | <i>Caulobacter fusiformis</i> (97)                              | Alphaproteobacteria      |
| WO15     | 391                                     | EF685174                    | <i>Sphingomonas aromaticivorans</i> (97)                        | Alphaproteobacteria      |
| WO16     | 511                                     | EF685172                    | <i>Brevundimonas vesicularis</i> (98)                           | Alphaproteobacteria      |
| WO17     | 490                                     | EF685179                    | <i>Azorhizobium caulinodans</i> (98)                            | Alphaproteobacteria      |
| WO18     | 434                                     | EF685168                    | <i>Bacillus thuringiensis</i> (99)                              | Firmicutes               |

\*Isolates coded B are from bamboo leaf infusions, and isolates coded WO are from white oak leaf infusions.

**Table S2. Carboxylic acids and methyl esters identified from a bioactive 1-min (1 ml) HPLC fraction of a methanol extract of lyophilized bacterial cells and quantified from the crude methanol extract**

| Compound                         | Amount ( $\pm$ SEM) extrapolated to 0.05-ml equivalents of the culture medium ( $10^6$ cells per ml), ng* | Ratio (% of total) of eight compounds | Ratio (% of total) of three bioactive compounds |
|----------------------------------|-----------------------------------------------------------------------------------------------------------|---------------------------------------|-------------------------------------------------|
| Nonanoic acid                    | 0.027 (0.013)                                                                                             | 0.78                                  | 15.94                                           |
| Decanoic acid                    | 0.013 (0.006)                                                                                             | 0.38                                  |                                                 |
| Dodecanoic acid                  | 0.111 (0.076)                                                                                             | 3.20                                  | 83.01                                           |
| Tetradecanoic acid               | 0.142 (0.021)                                                                                             | 4.08                                  |                                                 |
| Tetradecanoic acid, methyl ester | 0.002 (0.001)                                                                                             | 0.05                                  | 1.05                                            |
| Hexadecanoic acid                | 2.640 (0.756)                                                                                             | 75.77                                 |                                                 |
| Hexadecanoic acid, methyl ester  | 0.024 (0.010)                                                                                             | 0.68                                  |                                                 |
| Octadecanoic acid                | 0.524 (0.412)                                                                                             | 15.05                                 |                                                 |

Amount (in nanograms) corrected per 0.05-ml equivalents of the bacterial culture ( $10^6$  cells per ml), which were highly stimulatory in binary choice oviposition assays ( $81.6 \pm 6.7\%$  of the eggs placed in the extract-treated cup;  $n = 17$  assays with single gravid females,  $P < 0.0001$ ).

\*For chemical analysis, 0.6 ml of lyophilized bacterial cells (equivalent to 60 ml of  $10^9$  cells per ml) was extracted in 30 ml of methanol and processed for GC-MS analysis.  $n = 4$ .

**Table S3. Oviposition-stimulatory activity of a RP-HPLC fraction and its acidic and basic constituents**

| Fraction*           | No. of assays <sup>†</sup> | Treatment, % | Control, % | SEM, % | Eggs per assay $\pm$ SEM | <i>t</i> | <i>P</i> <sup>‡</sup> |
|---------------------|----------------------------|--------------|------------|--------|--------------------------|----------|-----------------------|
| 1-min HPLC fraction | 21                         | 66.8         | 33.2       | 8.0    | 75.9 $\pm$ 4.8           | 2.357    | <b>0.0143</b>         |
| Basified fraction   | 22                         | 38.2         | 61.8       | 7.3    | 84.0 $\pm$ 4.7           | -1.448   | 0.0811                |
| Acidified fraction  | 23                         | 74.3         | 25.7       | 7.7    | 78.4 $\pm$ 6.3           | 2.970    | <b>0.0035</b>         |

\*A 0.05-ml equivalent of culture was used in each bioassay.

<sup>†</sup>Twenty-four single female assays were conducted for each treatment. Assays in which a female oviposited <20 eggs in total in 72 h were discarded.

<sup>‡</sup>Based on paired *t* test of arcsin $\sqrt{x}$  transformed data, using a one-tailed test. Bold numbers indicate significant stimulation of oviposition.

**Table S4. Egg-laying bioassays of *Ae. aegypti*, showing dose–response patterns to synthetic carboxylic acids and methyl esters identified from a 1-min (1 ml) HPLC fraction of a methanol extract of lyophilized bacterial cells**

| Tested compound                  | Dose, ng | <i>n</i> assays* | Treatment, % | Control, % | SEM, % | Eggs per assay | <i>t</i> | <i>P</i> <sup>†</sup> |
|----------------------------------|----------|------------------|--------------|------------|--------|----------------|----------|-----------------------|
| Nonanoic acid                    | 1        | 22               | 38.6         | 61.4       | 8.4    | 70.9 ± 4.0     | −1.3612  | 0.0939                |
|                                  | 10       | 22               | 58.3         | 41.7       | 7.7    | 74.3 ± 6.1     | 0.9928   | 0.1661                |
|                                  | 100      | 20               | 69.1         | 30.9       | 7.3    | 80.0 ± 3.3     | 2.3936   | <b>0.0136</b>         |
| Decanoic acid                    | 1        | 18               | 43.7         | 56.3       | 8.6    | 60.0 ± 5.6     | −0.9281  | 0.1832                |
|                                  | 10       | 19               | 52.2         | 47.9       | 9.5    | 61.3 ± 5.0     | 0.2907   | 0.3873                |
|                                  | 100      | 13               | 45.8         | 54.2       | 11.3   | 67.0 ± 7.0     | −0.6707  | 0.2576                |
| Dodecanoic acid                  | 1        | 22               | 47.0         | 53.1       | 8.8    | 67.3 ± 4.0     | −0.1725  | 0.4324                |
|                                  | 10       | 20               | 43.4         | 56.6       | 9.9    | 66.3 ± 3.1     | −0.6563  | 0.2598                |
|                                  | 100      | 20               | 47.6         | 52.4       | 8.8    | 63.8 ± 3.4     | −0.4214  | 0.3389                |
|                                  | 0.01 mg  | 26               | 52.2         | 47.8       | 7.9    | 66.5 ± 4.2     | 0.4157   | 0.3406                |
|                                  | 0.1 mg   | 28               | 45.8         | 54.3       | 7.7    | 64.4 ± 2.9     | −0.6835  | 0.2501                |
|                                  | 1.0 mg   | 28               | 42.2         | 58.8       | 8.6    | 60.2 ± 2.8     | −1.0455  | 0.1525                |
| Tetradecanoic acid               | 1        | 24               | 45.4         | 54.6       | 8.2    | 79.6 ± 2.7     | −0.5287  | 0.3010                |
|                                  | 10       | 23               | 81.0         | 19.0       | 6.9    | 87.7 ± 5.1     | 4.6939   | <b>0.0001</b>         |
|                                  | 100      | 23               | 62.1         | 37.9       | 8.3    | 80.2 ± 5.2     | 1.3952   | 0.0884                |
| Tetradecanoic acid, methyl ester | 1        | 21               | 55.0         | 45.0       | 9.5    | 68.3 ± 5.4     | 0.5160   | 0.3058                |
|                                  | 10       | 19               | 70.2         | 29.8       | 8.4    | 64.0 ± 7.1     | 2.1661   | <b>0.0220</b>         |
|                                  | 100      | 19               | 51.0         | 49.0       | 8.9    | 70.6 ± 6.0     | −0.0185  | 0.4927                |
| Hexadecanoic acid                | 1        | 21               | 53.4         | 46.6       | 8.9    | 63.7 ± 4.2     | 0.1818   | 0.4288                |
|                                  | 10       | 17               | 43.2         | 56.8       | 8.0    | 63.5 ± 4.9     | −0.9320  | 0.1826                |
|                                  | 100      | 19               | 38.2         | 61.8       | 9.4    | 71.8 ± 4.8     | −1.1175  | 0.1392                |
| Hexadecanoic acid, methyl ester  | 1        | 19               | 34.7         | 65.4       | 8.3    | 51.0 ± 3.5     | −1.8761  | 0.0385                |
|                                  | 10       | 18               | 59.1         | 40.9       | 9.0    | 51.3 ± 3.0     | 0.7242   | 0.2394                |
|                                  | 100      | 17               | 60.4         | 39.6       | 10.1   | 58.6 ± 3.8     | 0.9887   | 0.1688                |
| Octadecanoic acid                | 1        | 19               | 55.1         | 44.9       | 9.0    | 71.3 ± 3.3     | 0.5397   | 0.2980                |
|                                  | 10       | 20               | 46.4         | 53.7       | 9.7    | 69.0 ± 3.6     | −0.4201  | 0.3395                |
|                                  | 100      | 19               | 58.4         | 41.6       | 8.4    | 64.8 ± 4.8     | 0.9383   | 0.1802                |

\*Twenty-four assays were conducted for each compound–dose combination with individual gravid females. Assays in which a female oviposited <20 eggs in total in 72 h were discarded; on average, 19.75 ± 0.48 of the 24 assays were included.

<sup>†</sup>Based on paired *t* test of arcsin $\sqrt{x}$  transformed data, using a one-tailed test. Bold numbers indicate significant stimulation of oviposition.

Table S5. Egg-laying bioassays of *Ae. aegypti*, showing dose–response patterns to tetradecanoic acid, using five females per assay in 24-h assays

| Dose, ng | No. of assays | Treatment, % | Control, % | SEM, % | Eggs per assay | t      | P*                |
|----------|---------------|--------------|------------|--------|----------------|--------|-------------------|
| 0.01     | 12            | 52.3         | 47.7       | 4.7    | 318.5 ± 14.4   | 0.469  | 0.3240            |
| 0.1      | 12            | 57.8         | 42.2       | 6.4    | 232.1 ± 22.3   | 1.239  | 0.1206            |
| 1.0      | 12            | 76.9         | 23.1       | 8.6    | 216.8 ± 19.4   | 5.935  | <b>&lt;0.0001</b> |
| 10       | 12            | 57.9         | 42.1       | 6.8    | 196.4 ± 23.2   | 1.202  | 0.1274            |
| 100      | 12            | 38.7         | 61.3       | 8.4    | 260.4 ± 30.9   | −1.254 | 0.1179            |

\*Based on paired t test of arcsin $\sqrt{x}$  transformed data, using a one-tailed test. Bold numbers indicate significant stimulation of oviposition.
